# Supplementary material
Source: PubMed Central journal article supplement (PMC283551)
Supplement: pnas_100_24_14091__2.pdf [file pnas_100_24_14091__2.pdf]

1 10 20 30 40 50 60 70 80 90 100 110 120 130  
Junction1 ACTGCCTAGTGCCTTATATGACTAAATTAACCACTATAA...TCATACTCTCGTCAATAAATCAATAAATTTGATATAACCTAAACAAATACATATAAATCAATAAATTTGCTATAGCTATATAT  
Junction2 ACTGCCTAGTGCCTTATATGACTAAATTAACCACTATAA...TCATACTCTCGTCAATAAATCAATAAATTTGATATAACCTAAATAAATACATATAAATCAATAAATTTGCTATAGCTATATAT  
junction5 ACTGCCTAGTGCCTTATATGACTAAATTAACCACTATAA...TCATACTCTCGTCAATAAATCAATAAATTTGATATAACCTAAATAAATACATATAAATCAATAAATTTGCTATAGCTATATAT  
Junction4 ACTGCCTAGTGCCTTATATGACTAAATTAACCACTATAA...TCATACTCTCGTCAATAAATCAATAAATTTGATATAACCTAAATAAATACATATAAATCAATAAATTTGCTATAGCTATATAT  
Junction3trunc ACTGCCTAGTGCCTTATATGACTAAATTAACCACTATAA...TCATACTCTCGTCAATAAATCAATAAATTTGATATAACCTAAATAAATACATATAAATCAATAAATTTGCTATAGCTATATAT  
Consensus ACTGCCTAGTGCCTTATATGACTAAATTAACCACTATAA...TCATACTCTCGTCAATAAATCAATAAATTTGATATAACCTAAATAAATACATATAAATCAATAAATTTGCTATAGCTATATAT

131 140 150 160 170 180 190 200 210 220 230 240 250 260  
Junction1 TTTCATTACTTATTAATATACATATATACCTAGCATATATTTGCTACAACGTCCGCTACGGCAATCATACCCTCTTAGCTAAAAGAGAGCAATTTAATCAAAATATATTACTTATAAATAA  
Junction2 TTTCATTACTTATTAATATACATATATACCTAGCATATATTTGCTACAACGTCCGCTACGGCAATCATACCCTCTTAGCTAAAAGAGAGCAATTTAATCAAAATTTATTACTTATAAATAA  
junction5 TTTCATTACTTATTAATATACATATATACCTAGCATATATTTGCTACAACGTCCGCTACGGCAATCATACCCTCTTAGCTAAAAGAGAGCAATTTAATCAAAATTTATTACTTATAAATAA  
Junction4 TTTCATTACTTATTAATATACATATATACCTAGCATATATTTGCTACAACGTCCGCTACGGCAATCATACCCTCTTAGCTAAAAGAGAGCAATTTAATCAAAATTTATTACTTATAAATAA  
Junction3trunc TTTCATTACTTATTAATATACATATATACCTAGCATATATTTGCTACAACGTCCGCTACGGCAATCATACCCTCTTAGCTAAAAGAGAGCAATTTAATCAAAATTTATTACTTATAAATAA  
Consensus TTTCATTACTTATTAATATACATATATACCTAGCATATATTTGCTACAACGTCCGCTACGGCAATCATACCCTCTTAGCTAAAAGAGAGCAATTTAATCAAAATTTATTACTTATAAATAA

261 270 280 290 300 310 320 330 340 350 360 370 380 390  
Junction1 AATAATACATAATCAAAATAACAATTAACCCCTCAATCTA...TAAAACAGGTATTACATCAACTTTGCCATAAACTTCAGGCCAAGGTGACCAATCAATTACCTAAAATTTCTAGCAATTT  
Junction2 AATAATACATAATCAAAATAACAATTAACCCCTCAATCTA...TAAAACAGGTATTACATCAACTTTGCCATAAACTTCAGGCCAAGGTGACCAATCAATTACCTAAAATTTCTAGCAATTT  
junction5 AATAATACATAATCAAAATAACAATTAACCCCTCAATCTA...TAAAACAGGTATTACATCAACTTTGCCATAAACTTCAGGCCAAGGTGACCAATCAATTACCTAAAATTTCTAGCAATTT  
Junction4 AATAATACATAATCAAAATAACAATTAACCCCTCAATCTA...TAAAACAGGTATTACATCAACTTTGCCATAAACTTCAGGCCAAGGTGACCAATCAATTACCTAAAATTTCTAGCAATTT  
Junction3trunc AATAATACATAATCAAAATAACAATTAACCCCTCAATCTA...TAAAACAGGTATTACATCAACTTTGCCATAAACTTCAGGCCAAGGTGACCAATCAATTACCTAAAATTTCTAGCAATTT  
Consensus AATAATACATAATCAAAATAACAATTAACCCCTCAATCTA...TAAAACAGGTATTACATCAACTTTGCCATAAACTTCAGGCCAAGGTGACCAATCAATTACCTAAAATTTCTAGCAATTT

391 400 410 420 430 440 450 460 470 480 490 500 510 520  
Junction1 C-CAGCAAAGTGTGTGCCAATATATGACATGTGTGTGTGTGGGCAATTGTTCTGATTTTTCTTTGCACACCTATACAATCGCTAAATAGCTGCTGTGCGCAACTTGACACACACACGCATACACAC  
Junction2 C-CAGCAAAGTGTGTGCCAATATATGACATGTGTGTGTGTGGGCAATTGTTCTGATTTTTCTTTGCACACCTATACAATCGCTAAATAGCTGCTGTGCGCAACTTGACACACACACGCATACACAC  
junction5 TCAGCAAAGTGTGTGCCAATATATGACATGTGTGTGTGTGGGCAATTGTTCTGATTTTTCTTTGCACACCTATACAATCGCTAAATAGTGTGCTGCGCAACTTGACACACACACGCATACACAC  
Junction4 C-CAGCAAAGTGTGTGCCAATATATGACATGTGTGTGTGGGCAATTGTTCTGATTTTTCTTTGCACACCTATACAATCGCTAAATAGTGTGCTGCGCAACTTGACACACACACGCATACACAC  
Junction3trunc C-CAGCAAAGTGTGTGCCAATATATGACATGTGTGTGTGGGCAATTGTTCTGATTTTTCTTTGCACACCTATACAATCGCTAAATAGTGTGCTGCGCAACTTGACACACACACGCATACACAC  
Consensus C-CAGCAAAGTGTGTGCCAATATATGACATGTGTGTGTGGGCAATTGTTCTGATTTTTCTTTGCACACCTATACAATCGCTAAATAGTGTGCTGCGCAACTTGACACACACACGCATACACAC

521 530 540 550 560 570 580 590 600 610 620 630 640 650  
Junction1 ACTTATTACAGTTCATAAATTACACATATATACATCTATCAAAACATATACATATATCTTTCCATACATATCTACAACCTCTGTCAAACACATATATAACAACATATATATCTACAGCAACACA  
Junction2 ACTTATTACAGTTCATAAATTACACATATATACATCTATCAAAACATATACATATATCTTTCCATACATATCTACAACCTCTGTCAAACACATATATAACAACATATATATCTACAGCAACACA  
junction5 ACTTATTACATTTTATAAATTACACATATATACATCTATCAAAACATATACATATATCTTTCCATACATATCTACAACCTCTGTCAAACACATATATAACAACATATATATCTACAGCAACACA  
Junction4 ACTTATTACATTTTATAAATTACACATATATACATCTATCAAAACATATACATATATCTTTCCATACATATCTACAACCTCTGTCAAACACATATATAACAACATATATATCTACAGCAACACA  
Junction3trunc ACTTATTACATTTTATAAATTACACATATATACATCTATCAAAACATATACATATATCTTTCCATACATATCTACAACCTCTGTCAAACACATATATAACAACATATATATCTACAGCAACACA  
Consensus ACTTATTACATTTTATAAATTACACATATATACATCTATCAAAACATATACATATATCTTTCCATACATATCTACAACCTCTGTCAAACACATATATAACAACATATATATCTACAGCAACACA

651 660 670 680 690 700 710 720 730 740 750 760 770 780  
Junction1 TACAACCTCACTTATATACATTACTTCCCTCTTTTGTGACGTCCATATAAGTGACGCGCGCATAGAACTGACGAAGCTGAGAGCAGGGCGAACCGTAGCTAGTCGACTTTCTGGTTTGTGAATTGAC  
Junction2 TACAACCTCACTTATATACATTACTTCCCTCTTTTGTGACGTCCATATAAGTGACGCGCGCATAGAACTGACGAAGCTGAGAGCAGGGCGAACCGTAGCTAGTCGACTTTCTGGTTTGTGAATTGAC  
junction5 TACAACCTCACTTATATACATTACTTCCCTCTTTTGTGACGTCCATATAAGTGACGCGCGCATAGAACTGACGAAGCTGAGAGCAGGGCGAACCGTAGCTAGTCGACTTTCTGGTTTGTGAATTGAC  
Junction4 TACAACCTCACTTATATACATTACTTCCCTCTTTTGTGACGTCCATATAAGTGACGCGCGCATAGAACTGACGAAGCTGAGAGCAGGGCGAACCGTAGCTAGTCGACTTTCTGGTTTGTGAATTGAC  
Junction3trunc TACAACCTCACTTATATACATTACTTCCCTCTTTTGTGACGTCCATATAAGTGACGCGCGCATAGAACTGACGAAGCTGAGAGCAGGGCGAACCGTAGCTAGTCGACTTTCTGGTTTGTGAATTGAC  
Consensus TACAACCTCACTTATATACATTACTTCCCTCTTTTGTGACGTCCATATAAGTGACGCGCGCATAGAACTGACGAAGCTGAGAGCAGGGCGAACCGTAGCTAGTCGACTTTCTGGTTTGTGAATTGAC

781 790 800 810 820 830 840 850 860 870 880 890 900 910  
Junction1 TAATCGGTCACTTGGTGCGAACCAAAGCACACACTCAAAACAATCACACAAGCGCCATTTAGTCGTTTCATCCACCATCGCCATTTTGCACCTTTTCTATTTTATACAACTCAACCTTTG  
Junction2 TAATCGGTCACTTGGTGCGAACCAAAGCACACACTCAAAACAATCACACAAGCGCCATTTAGTCGTTTCATCCACCATCGCCATTTTGCACCTTTTCTATTTTATACAACTCAACCTTTG  
junction5 TAATCGGTCACTTGGTGCGAACCAAAGCACACACTCAAAACAATCACACAAGCGCCATTTAGTCGTTTCATCCACCATCGCCATTTTGCACCTTTTCTATTTTATACAACTCAACCTTTG  
Junction4 TAATCGGTCACTTGGTGCGAACCAAAGCACACACTCAAAACAATCACACAAGCGCCATTTAGTCGTTTCATCCACCATCGCCATTTTGCACCTTTTCTATTTTATACAACTCAACCTTTG  
Junction3trunc TAATCGGTCACTTGGTGCGAACCAAAGCACACACTCAAAACAATCACACAAGCGCCATTTAGTCGTTTCATCCACCATCGCCATTTTGCACCTTTTCTATTTTATACAACTCAACCTTTG  
Consensus TAATCGGTCACTTGGTGCGAACCAAAGCACACACTCAAAACAATCACACAAGCGCCATTTAGTCGTTTCATCCACCATCGCCATTTTGCACCTTTTCTATTTTATACAACTCAACCTTTG

911 920 930 940 950 960 970 980 990 1000 1010 1020 1030 1040  
Junction1 CATAAACCAACAAAGAGCTCAAGCTTTTACACGTCCTTAAATTTTTCGTAAGGTTGACACAACAAATCAAAACTGGTGTTCATCACCATAAATCAATAAATTAARACTA  
Junction2 CATAAACCAACAAAGAGCTCAAGCTTTTACACGTCCTTAAATTTTTCGTAAGGTTGACACAACAAATCAAAACTGGTGTTCATCACCATAAATCAATAAATTAARACTA  
junction5 CATAAACCAACAAAGAGCTCAAGCTTTTACACGTCCTTAAATTTTTCGTAAGGTTGACACAACAAATCAAAACTGGTGTTCATCACCATAAATCAATAAATTAARACTA  
Junction4 CATAAACCAACAAAGAGCTCAAGCTTTTACACGTCCTTAAATTTTTCGTAAGGTTGACACAACAAATCAAAACTGGTGTTCATCACCATAAATCAATAAATTAARACTA  
Junction3trunc CATAAACCAACAAAGAGCTCAAGCTTTTACACGTCCTTAAATTTTTCGTAAGGTTGACACAACAAATCAAAACTGGTGTTCATCACCATAAATCAATAAATTAARACTA  
Consensus CATAAACCAACAAAGAGCTCAAGCTTTTACACGTCCTTAAATTTTTCGTAAGGTTGACACAACAAATCAAAACTGGTGTTCATCACCATAAATCAATAAATTAARACTA

1041 1050 1060 1070 1080 1090 1100 1110 1120 1130 1140 1150 1160 1170  
Junction1 AATACTTACCTTAATCAACCTATTAATAAATTGAAGCTTAATCAGGTGTGTCGCCACCAACATATTAGCTACAAATCACACATACACTTACTTATACTTACCTTATCACACCTTCTCATATACTTAC  
Junction2 AATACTTACCTTAATCAACCTATTAATAAATTGAAGCTTAATCAGGTGTGTCGCCACCAACATATTAGCTACAAATCACACATACACTTACTTATACTTACCTTATCACACCTTCTCATATACTTAC  
junction5 AATACTTACCTTAATCAACCTATTAATAAATTGAAGCTTAATCAGGTGTGTCGCCACCAACATATTAGCTACAAATCACACATACACTTACTTATACTTACCTTATCACACCTTCTCATATACTTAC  
Junction4 AATACTTACCTTAATCAACCTATTAATAAATTGAAGCTTAATCAGGTGTGTCGCCACCAACATATTAGCTACAAATCACACATACACTTACTTATACTTACCTTATCACACCTTCTCATATACTTAC  
Junction3trunc AATACTTACCTTAATCAACCTATTAATAAATTGAAGCTTAATCAGGTGTGTCGCCACCAACATATTAGCTACAAATCACACATACACTTACTTATACTTACCTTATCACACCTTCTCATATACTTAC  
Consensus AATACTTACCTTAATCAACCTATTAATAAATTGAAGCTTAATCAGGTGTGTCGCCACCAACATATTAGCTACAAATCACACATACACTTACTTATACTTACCTTATCACACCTTCTCATATACTTAC

1171 1180 1190 1200 1210 1220 1230 1240 1250 1260 1270 1280 1290 1300  
Junction1 CTATACTTACCATTATCACACCTTCATATACATATATTCATACTCACCTCATCACCTTCATATCTTTATATTTACGCCCTATAAATAAATTTA-TCTCTTTCTGGTGTACCATCACCAC---A  
Junction2 CTATACTTACC-TTATCACACCTTCATAT---TACATATAT---TCATACTTACCTAT-ACTTACCTTATCATACTC-ATATATAATTATAATTTATACCGGTGTGCCATCACCATCACA  
junction5 CTATACTTACC-TTATCACACCTTCATAT---TACATATAT---TCATACTTACCTAT-ACTTACCTTATCATACTC-ATATATAATTATAATTTATACCGGTGTGCCATCACCATCACA  
Junction4 CTATACTTACCATTATCACACCTTCATAT---ATATCTTATACTTACCCTATCACACCTTCATAT-TTATATTTACGCCCTATAAATAAATTTAATTTATACCGGTGTGCCATCACCATCATA  
Junction3trunc CTATACTTACCATTATCACACCTTCATAT---ATATCTTATACTTACCCTATCACACCTTCATAT-TTATATTTACGCCCTATAAATAAATTTAATTTATACCGGTGTGCCATCACCATCATA  
Consensus ctatacttacc,ttatcacaccttcatat...ta..t..at.....tca,ac,t,c,tat...t,a..tt..c...ct..a,ata,aa,t,ta,t,tc,t,c,gggtgt,ccatcaccac...a

1301 1310 1320 1330 1340 1350 1360 1370 1380 1390 1393  
Junction1 AACCATACTTTACTTA---CCTTCACACAAC---TGCTCGC  
Junction2 AACCATACTTTACTTA---CCTTCACACAAC---TGCTCGC  
junction5 AACCATACTTTACTTA---CCTTCACACAAC---TGCTCGC  
Junction4 AACCATACTTTACTTA---CCTTCACACAAC---TGCTCGC  
Junction3trunc AACCATACTTTACTTA---CCTTCACACAAC---TGCTCGC  
Consensus aa..ata..t.a..ta....ctt..c.....t.ct..c.....
